# Supplementary material
Source: publisher figshare collection journal article supplement (https://tandf.figshare.com/ndownloader/files/22113930)

### **Supplementary material**

**Green chemistry approach to the synthesis of 3-substituted-quinazolin-4(3*H*)-ones and 2-methyl-3-substituted-quinazolin-4(3*H*)-ones and biological evaluation**

Mario Komara, Maja Molnara, Marijana Jukićb, Ljubica Glavaš-Obrovacb, Teuta Opačak-Bernardib,*

aFaculty of Food Technology Osijek, Josip Juraj Strossmayer University of Osijek, F. Kuhača 20 HR-31000 Osijek, Croatia;

b Faculty of Medicine, Josip Juraj Strossmayer University of Osijek, J. Huttlera 4, HR-31000 Osijek, Croatia

### **3-(4-(trifluoromethoxy)phenyl)quinazolin-4(3H)-one (1)**


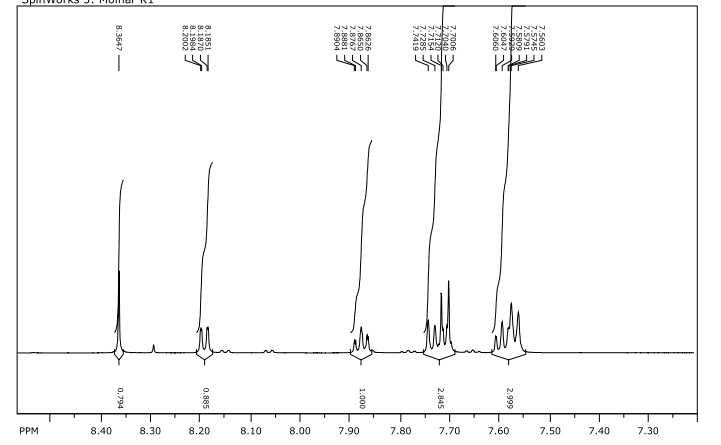


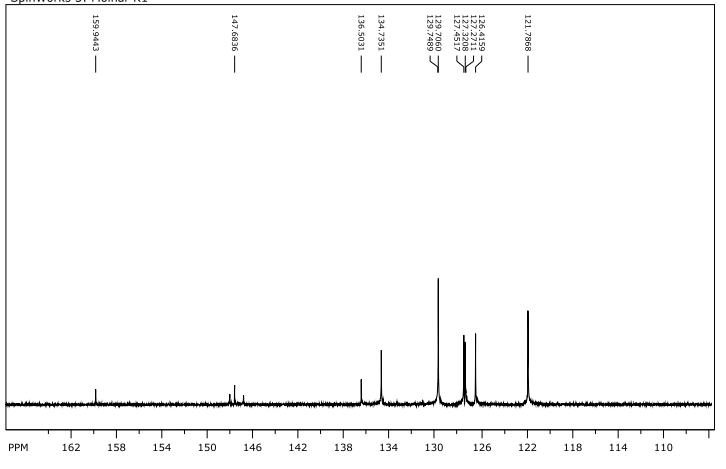


***3-(2,5-dimethoxyphenyl)quinazolin-4(3H)-one* (2)**


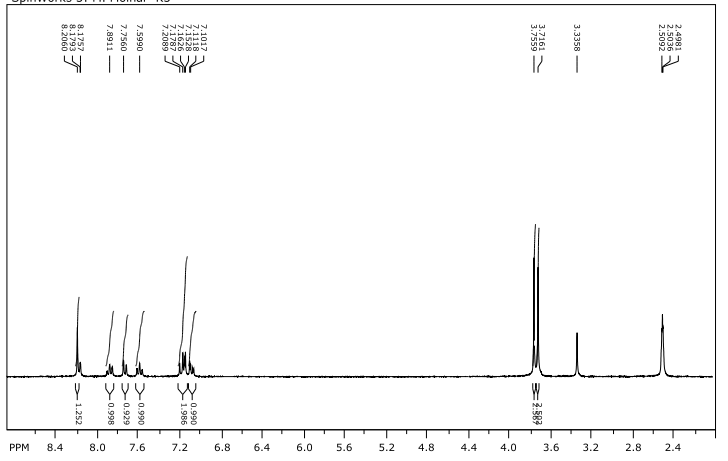


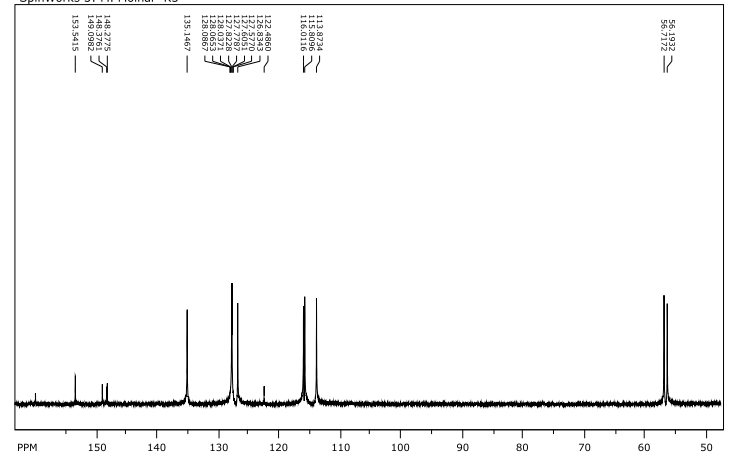


### **3-phenylquinazolin-4(3H)-one (3)**


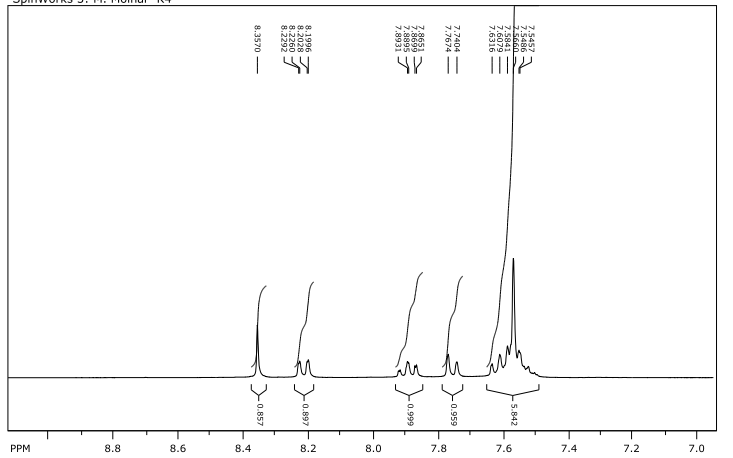


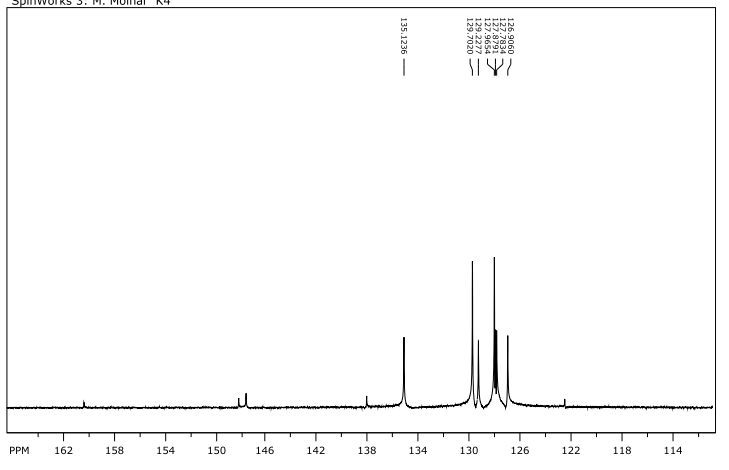


### **2-(4-oxoquinazolin-3(4H)-yl)benzoic acid (4)**


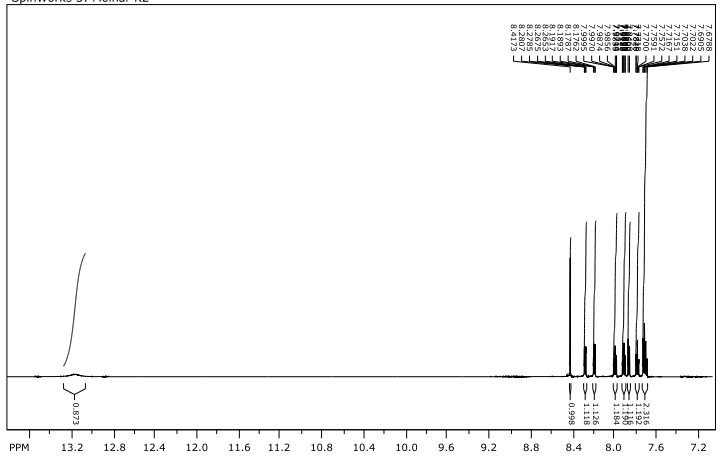


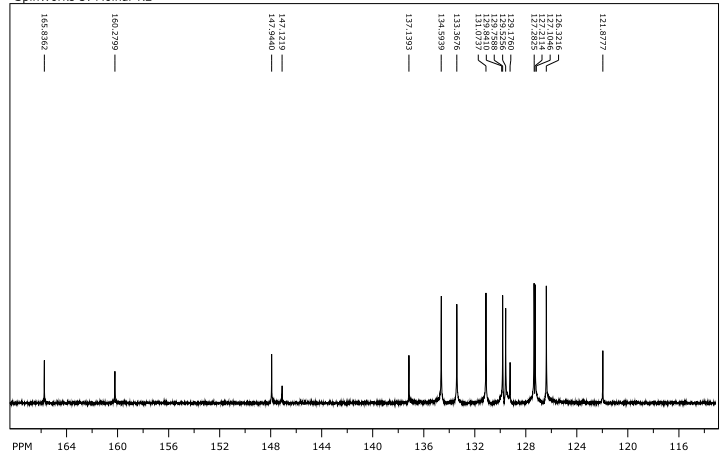


###
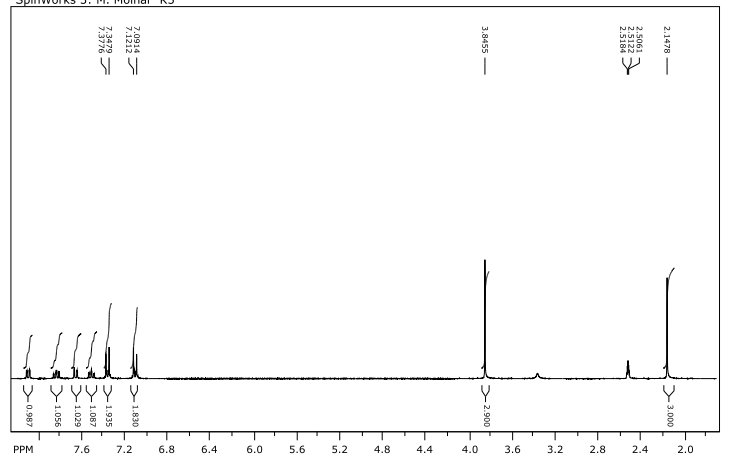
**3-(4-methoxyphenyl)-2-methylquinazolin-4(3H)-one (5)**


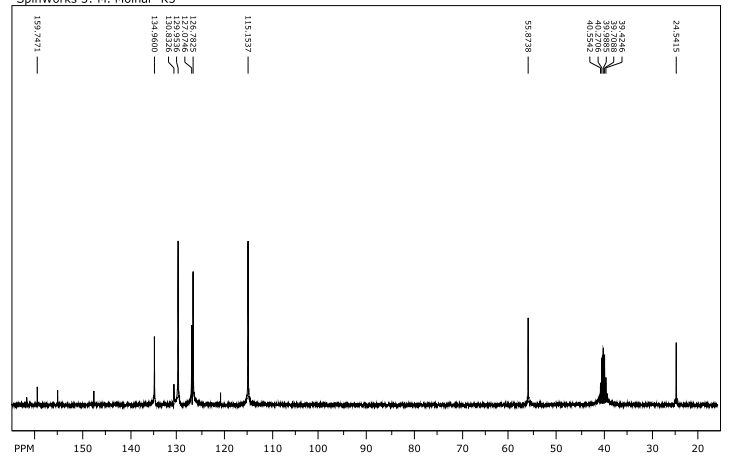


### **3-(4-chlorophenyl)-2-methylquinazolin-4(3H)-one (6)**


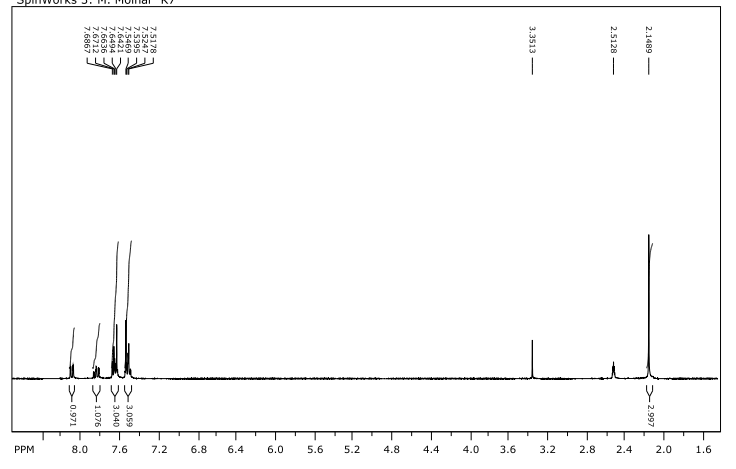


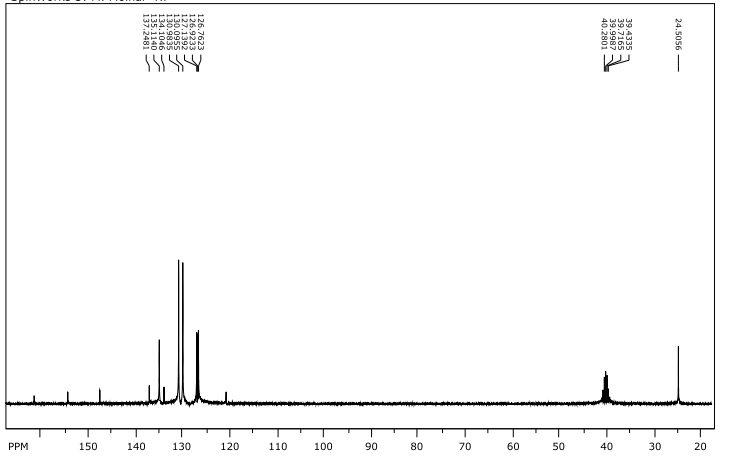


### **3-(4-methoxyphenyl)-2-methyl-6-nitroquinazolin-4(3H)-one (7)**


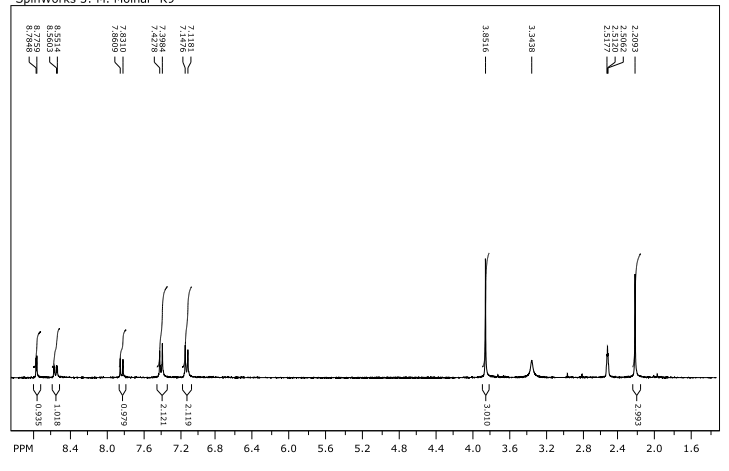


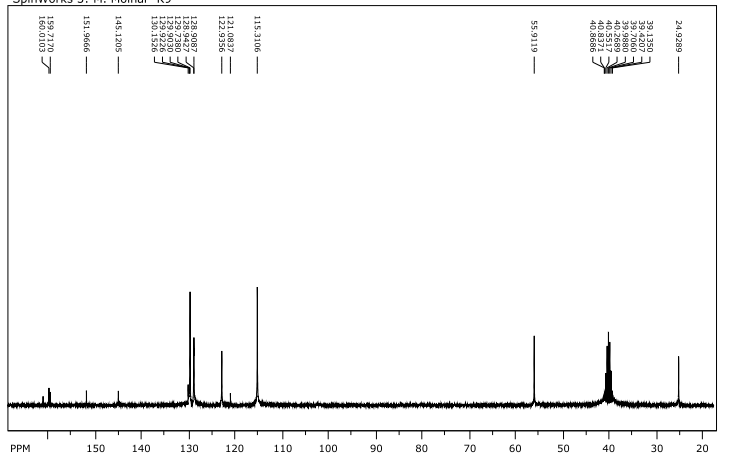


### **2-(7-hydroxy-2-oxo-2H-chromen-4-yl)-N-(2-methyl-4-oxoquinazolin-3(4H)-yl)acetamide (8)**


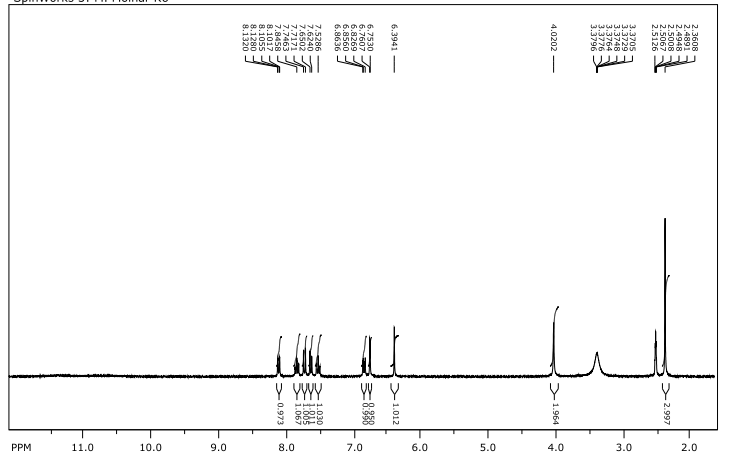


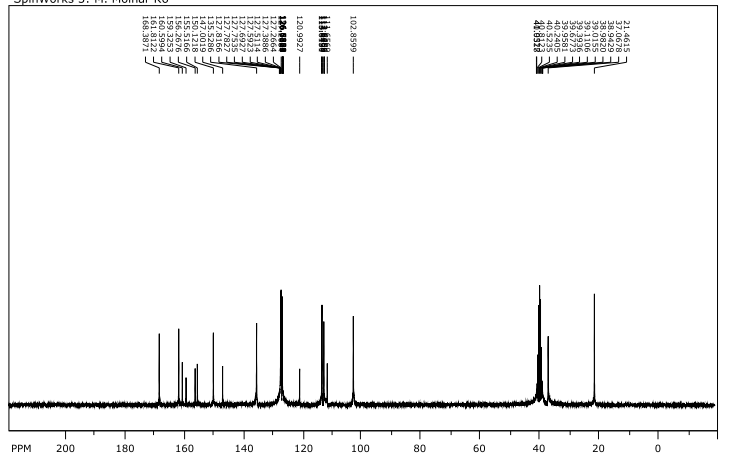


### **3-(4-bromophenyl)-2-methylquinazolin-4(3H)-one (9)**


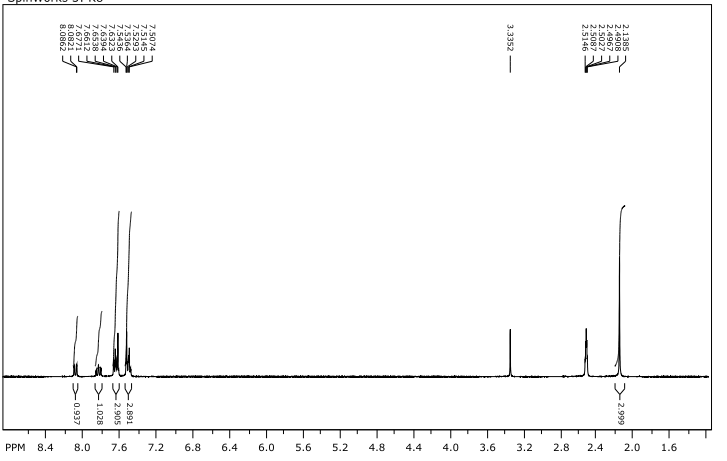


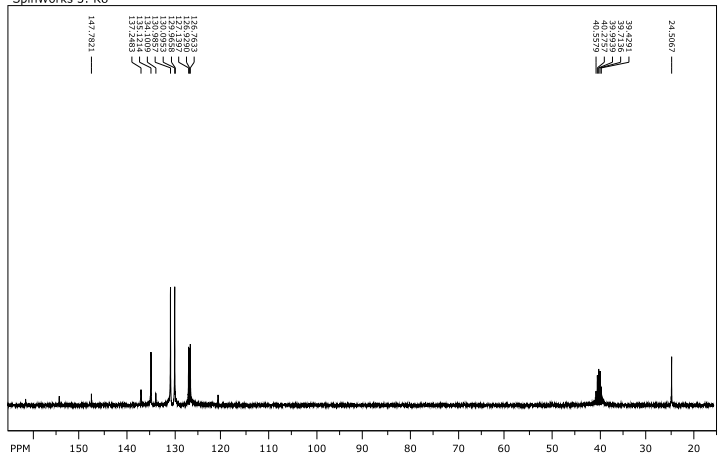


### **2-((4-methyl-2-oxo-2H-chromen-7-yl)oxy)-N-(2-methyl-4-oxoquinazolin-3(4H)-yl)acetamide (10)**


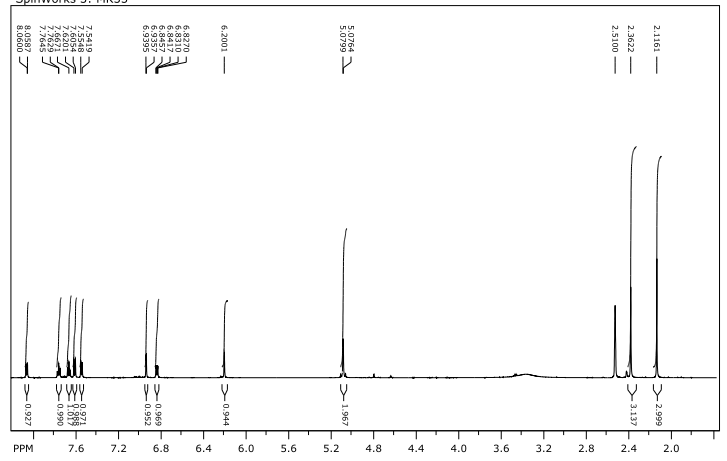


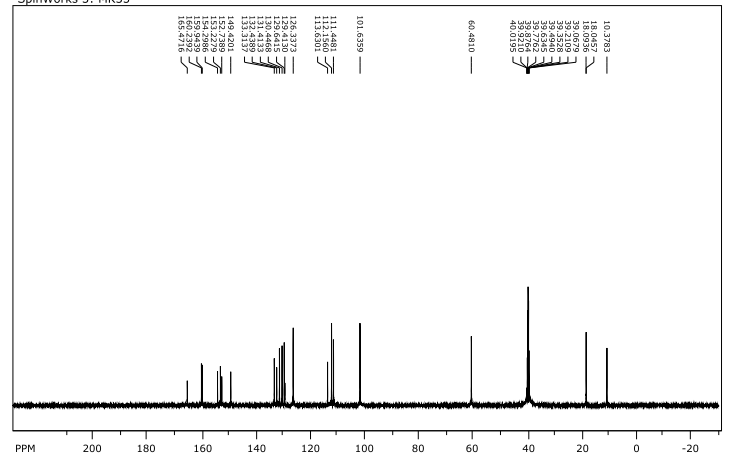

Supplement: Supplementary file 1 [file 22113930]
